# Supplementary material
Source: Research Square preprint supplement (doi:10.21203/rs.3.rs-8918776/v2)
Supplement: Supplementary file 1 [file 064bd96be0746b2787fc1ddd.docx]

### Additional file 1

### Introduction and use of the checklist and recommendations

**Why:** Supervisors are responsible for implementing the work ability management practices at workplaces. The checklist and related recommendations are intended as tools for workplaces to develop and implement work ability management practices from the supervisors' perspective.

**For whom:** The checklist and recommendations can be used across different units, such as service or profit areas, and to select development areas. In addition to supervisors, people from different roles in the organization, such as middle management, human resources, and occupational safety, should be involved in the assessment and development of the implementation of work ability management. A multiprofessional group is needed because the methods for improving implementation require the competence, effort, and decision-making authority of people in different positions.

**Content:** The electronically completed checklist contains 24 statements, the realization of which in one’s own workplace is assessed on a scale of yes, no, or partly. The recommendations consist of ten points containing concrete proposals to support the implementation of work ability management. The recommendations have been divided into three types according to the factors contributing to implementation: competence, opportunities, and motivation.

**Benefits:** The checklist, based on research and practical experience, helps supervisors, leadership, and HR identify issues that contribute to the successful implementation of work ability management and select development areas. The recommendations provide concrete proposals for developing the implementation.

### How to use the checklist

**Fill in the checklist in a group**

- Invite individuals responsible for work ability management, such as representatives from senior management, middle management, supervisors, HR, and occupational safety, to meet and develop an implementation plan for work ability management. The person convening the meeting may be from any of the groups mentioned above. Note that the group should include representatives from different levels of management.
- Bring a paper or online version of the checklist to be filled in during your meeting. Remember to save the list you have filled in so that you can return to it later.

**Go through all items in the checklist**

- The checklist contains 24 statements, the realization of which in one’s own workplace is assessed on a scale of yes, no, or partly.
- Pay particular attention to statements that require development and consider ways of influencing those areas.

**Agree on how to proceed**

- Select up to three development areas at a time and enter them in the first column of the planning form. For each development area, think about 1-3 measures and record them in the second column of the form. When planning activities, use the recommendations for concrete measures.
- Agree on and record in the checklist how each matter will be promoted, what the schedule will be, and who will be responsible for it.

**Follow-up, evaluate, and communicate**

- Agree on when you will review the checklist measures and assess their progress, and how they have succeeded.
- Remember to also communicate the results widely at the workplace.
