# Supplementary material
Source: Research Square preprint supplement (doi:10.21203/rs.3.rs-8918776/v2)
Supplement: Supplementary file 2 [file 384a61106dcfedcd36d66efb.docx]

### Additional file 2

### Checklist for the implementation of work ability management

| Unit assessed: |
| --- |
| Participants: |
| Date: |

| **Factors or practices linked to implementation** | Yes | No | Partly | Observations |
| --- | --- | --- | --- | --- |
| **Knowledge-based management** | | | | |
| Supervisors know the objectives set for work ability management at both the organizational and unit levels. |  |  |  |  |
| Supervisors have sufficient competence in searching for, interpreting, and using information related to the personnel’s work ability (e.g., absences, turnover, competence needs). |  |  |  |  |
| Top management is involved in defining how information is used to manage personnel’s work ability. |  |  |  |  |
| The workplace has functional, up-to-date, and adequate information systems in place to support management. |  |  |  |  |
| The top management is interested in work ability management, allocates sufficient resources to it, and follows and evaluates its implementation. |  |  |  |  |
| **Models and practices for supporting work ability** | | | | |
| Information on models supporting work ability, such as the early support model, is easy to find, and supervisors can use it. |  |  |  |  |
| Supervisors have sufficient competence to identify the need for support for work ability. |  |  |  |  |
| Practices for identifying and responding to psychological and physical work-related strain have been agreed upon in the workplace. |  |  |  |  |
| Issues affecting work ability, such as the employees’ health, competence, and motivation, as well as the work community, management, and factors external to the workplace, have been considered in the workplace’s models supporting work ability. |  |  |  |  |
| The workplace models supporting work ability consider all stages of support: anticipation, early support, and return-to-work support after a long absence. |  |  |  |  |
| The employees understand the importance of promoting and supporting work ability and their own role in it. |  |  |  |  |
| **Factors or practices linked to implementation** | Yes | No | Partly | Observations |
| **Cooperation and support** | | | | |
| Supervisors, HR, and occupational safety maintain regular and sufficient cooperation. |  |  |  |  |
| Supervisors are familiar with the contents of the occupational healthcare agreement. |  |  |  |  |
| Supervisors are familiar with the roles, responsibilities, and practices of the various actors in occupational health cooperation, and cooperation runs smoothly. |  |  |  |  |
| Middle management supports the supervisor’s coping at work and work management |  |  |  |  |
| Middle management supports supervisors in managing the employees’ work ability |  |  |  |  |
| Supervisors receive peer support from other supervisors in managing work ability. |  |  |  |  |
| **Flow of information** | | | | |
| Information flow practices have been jointly agreed upon, and everyone is familiar with them. |  |  |  |  |
| Information flows consistently between leadership and employees. |  |  |  |  |
| Supervisors receive the information necessary to support their employees' work ability from occupational healthcare. |  |  |  |  |
| **Organizational culture** | | | | |
| Supervisors can meet and support employees of different ages, at different stages in their careers, and from different backgrounds. |  |  |  |  |
| Supervisors and employees are heard in the decision-making process. |  |  |  |  |
| Our workplace has an open, respectful, and confidential atmosphere. |  |  |  |  |
| Supervisors are committed to the management of work ability |  |  |  |  |

### Development measures planning form

| **Development area** | **Measure** | **Responsible person(s)** | **Timetable** | **Follow-up** |
| --- | --- | --- | --- | --- |
|  | 1 |  |  |  |
| 2 |  |  |  |
| 3 |  |  |  |
|  | 1 |  |  |  |
| 2 |  |  |  |
| 3 |  |  |  |
|  | 1 |  |  |  |
| 2 |  |  |  |
| 3 |  |  |  |
