# Supplementary material
Source: Research Square preprint supplement (doi:10.21203/rs.3.rs-8918776/v2)
Supplement: Supplementary file 3 [file 66725e8435faffbeceaed4d1.docx]

Table 1. Study Design: Research Questions, Applied Methods, Objectives, Content, and Informants.

|  | **Method** | **Objective** | **Content** | **Informants** |
| --- | --- | --- | --- | --- |
| *Research question 1: Identifying the facilitators and barriers to WAM implementation* | Work Ability Management Overview Tool -Survey [32] | To identify and prioritize areas for development in WAM. | 38 statements in five areas of WAM: Strategic nature of WAM, Knowledge-based management, Operational models and implementation, Information flow and collaboration, Organizational culture. | 88 supervisors from the three participative sectors. |
| Supervisor Survey | To gain a deeper understanding of how the supervisors implement WAM in their daily management. | 56 statements in five areas: My ability to manage work ability, Resources available for the implementation of WAM, Motivation, and Action. | 87 supervisors from the three participative sectors. |
| Focus-group interview | To obtain information about the supervisors’ own perceptions of facilitators and barriers to the implementation of WAM. | Semi-structured interviews | 17 (3 men, 14 women) supervisors from the three participative sectors. |
| *Research question 2: Co-creating a checklist and recommendations for WAM implementation* | Co-creation workshop 1 | To gather common information on barriers to implementing WAM and the necessary actions to overcome them. | 3-hour online workshop | In total, 11 supervisors (1 man, 10 women) from both organizations |
| Co-creation workshop 2 | To introduce the first version of the checklist, to evaluate the checklist, and to discuss dissemination strategies for the checklist and recommendations. | 3-hour online workshop | In total, 11 supervisors from both organizations |
