# Supplementary material
Source: Research Square preprint supplement (doi:10.21203/rs.3.rs-8918776/v2)
Supplement: Supplementary file 4 [file 8237863f63615e9f8d8e3c7b.docx]

## Additional file 3

## Recommendations for work ability management implementation

These ten recommendations will help you succeed in implementing work ability management. They have been divided into three groups: competence development, implementation opportunities, and motivation. The recommendations are based on the data collected in the project “Supervisors as implementers of work ability management in healthcare and social welfare” and on co-creation with supervisors.

### Competence development

**1. Strengthening supervisors’ competence in knowledge-based management**

**Methods of implementation:**

- **Orientation of new supervisors:** The principles of knowledge-based management, such as the systems used, the information monitored, and the ways of using the information, will be included in the orientation of supervisors.
- **Regular training:** Training is organized annually, and it deals with the application, interpretation, and use of information related to work ability (e.g., absences, employee turnover, competence needs).
- **Interactive learning methods:** Face-to-face training, case work, and group discussions are used in which supervisors can share experiences and learn from each other.
- **Cooperation with experts:** Developing knowledge-based management practices together with HR, occupational healthcare, the employment pension insurance company, and occupational safety.

**2. Clarifying and effectively introducing operating models for supporting work ability**

**Methods of implementation:**

- **Co-creation:** Supervisors are involved in the development of models supporting work ability to ensure that the models meet practical needs.
- **Clear documentation:** The operating models are described clearly and concretely.
- **Orientation and updates:** It is ensured that supervisors are familiarized with the operating models at the beginning of their orientation and whenever the models are updated.

**3. Creating cooperation practices to support work ability**

**Methods of implementation:**

- **Regular cooperation meetings:** Smooth and scheduled cooperation practices are created between supervisors, HR, and occupational safety.
- **Clarity of roles and responsibilities:** The internal roles and responsibilities of the workplace and those of occupational health cooperation in the orientation of supervisors, and when changes are made to the occupational healthcare agreement are reviewed.
- **Management of strain:** The practices of early support for proactive identification and monitoring of mental and physical strain (e.g., observing changes in work ability in everyday life, risk assessments, personnel surveys, development discussions) are agreed on in cooperation with supervisors, HR, occupational safety, and occupational health care.
- **Support from HR:** It is ensured that HR supports supervisors in the monitoring of information on work ability and the planning of measures.

### Supervisors’ opportunities for implementation

**4. Strengthening the structures and practices of knowledge-based management**

**Methods of implementation:**

- **Information needs:** The leadership is involved in defining what information is needed to support work ability management, where the information is obtained from, and how it is used.
- **Coordination:** The obtaining and use of information is coordinated centrally, and the practices are communicated clearly to supervisors.
- **Flow of information:** Regular meetings and multi-channel communication are used to ensure the information flow.

**5. Developing information systems in a user-oriented manner**

**Methods of implementation:**

- **Consultation of supervisors:** Supervisors are actively consulted in the selection and development of systems.
- **Tailoring:** Systems are tailored to meet supervisors’ information needs in work ability management.
- **Training and support:** User training is organized on a regular basis, and technical support is easily available.

**6. The multidimensional concept of work ability and the accessibility of the models are considered when supporting work ability**

**Methods of implementation:**

- **Coverage:** The models supporting work ability cover all stages: anticipation, early support, and return-to-work support.
- **Broadness:** The models consider the factors affecting work ability broadly, i.e., not only health, competence, and motivation but also the work, the work environment, management, and the employee’s personal life situation.
- **Accessibility:** The models are clearly described and placed in an easily accessible location, such as an intranet or supervisors´ dashboard.

**7. Support to supervisors will be strengthened**

**Methods of implementation:**

- **Role of middle management:** Middle management provides supervisors with support for work ability management and monitors their workload.
- **Communication:** Low-threshold communication practices are agreed upon between supervisors and middle management.
- **Peer support:** Structures for peer support are created, such as regular forums for supervisors or thematic discussion events.

**8. Promoting an inclusive and confidential work community**

**Methods of implementation:**

- **Consultation:** Personnel and supervisors are consulted in decision-making, for example, by using workshops, surveys, and discussion channels.
- **Communication practices:** Communication practices have been agreed jointly, and everyone is aware of them.
- **Sharing information in occupational health cooperation:** It is ensured in occupational health cooperation that supervisors have a clear understanding of what information can be shared and how work ability can be supported through cooperation.

## Motivation

**9. The leadership strengthens the adoption and establishment of models that support work ability**

**Methods of implementation:**

- **Ensuring resources:** The leadership top management ensures that sufficient personnel, time, and competence have been allocated to work ability management. This can be supported, for example, by appointing a responsible person or a team to coordinate the measures conducted in work ability management.
- **Realistic timetables:** When projects and measures are planned, sufficient time is allowed for achieving the objectives. The top management ensures that measures related to work ability are not overwhelmed by other work.
- **Follow-up and communication:** The top management regularly monitors how the objectives of work ability management are achieved and communicates the results and progress to supervisors, for example, in monthly reviews or team meetings.

**10. Strengthening employees’ understanding and role in promoting work ability**

**Methods of implementation:**

- **Joint discussions:** Themes related to work ability are regularly discussed in team meetings, in which the factors affecting work ability and the employees’ own role in maintaining it are discussed openly.
- **Training and awareness raising:** Short briefings or training sessions are organized for employees about the importance of work ability and how everyone can influence their own and the team’s work ability.
- **Employee engagement:** Employees are encouraged to discuss development proposals to support work ability and to actively participate in measures that promote work ability.
